# Supplementary material for: Age-dependent genes in adipose stem and precursor cells affect regulation of fat cell differentiation and link aging to obesity via cellular and genetic interactions
Source: PubMed Central journal article supplement (PMC10829214; doi:10.1186/s13073-024-01291-x), 2024-01-31
Supplement: 13073_2024_1291_MOESM2_ESM.pdf [file 13073_2024_1291_MOESM2_ESM.pdf]

## Supplementary Tables

**Table S1.** Summary of the estimated proportions of the 5 major subcutaneous adipose tissue cell-types in FTC (n=100).

| <b>Cell-type</b> | <b>Minimum</b> | <b>1<sup>st</sup><br/>quartile</b> | <b>Median</b> | <b>Mean</b> | <b>3<sup>rd</sup><br/>quartile</b> | <b>Maximum</b> | <b>Standard<br/>deviation</b> |
|------------------|----------------|------------------------------------|---------------|-------------|------------------------------------|----------------|-------------------------------|
| ASPC             | 0.167          | 0.220                              | 0.225         | 0.226       | 0.232                              | 0.293          | 0.013                         |
| Vascular         | 0.056          | 0.154                              | 0.162         | 0.162       | 0.168                              | 0.246          | 0.018                         |
| Myeloid          | 0.064          | 0.131                              | 0.137         | 0.138       | 0.146                              | 0.192          | 0.014                         |
| Adipocyte        | 0.322          | 0.410                              | 0.427         | 0.425       | 0.440                              | 0.558          | 0.029                         |
| T                | 0.011          | 0.041                              | 0.049         | 0.049       | 0.058                              | 0.086          | 0.014                         |

**Table S2.** Wilcoxon tests comparing proportions of the 5 major subcutaneous adipose tissue cell-types between the unrelated individuals below (n=28) and above 40 years old (n=22) in FTC.

| <b>Cell-type</b> | <b>Mean <math>\pm</math> SD of below 40<sup>A</sup></b> | <b>Mean <math>\pm</math> SD of over 40<sup>B</sup></b> | <b>W statistic<sup>C</sup></b> | <b>p-value<sup>D</sup></b> |
|------------------|---------------------------------------------------------|--------------------------------------------------------|--------------------------------|----------------------------|
| ASPC             | 0.229 $\pm$ 0.011                                       | 0.218 $\pm$ 0.015                                      | 454                            | 0.0038                     |
| Vascular         | 0.166 $\pm$ 0.012                                       | 0.153 $\pm$ 0.023                                      | 453                            | 0.0004                     |
| Myeloid          | 0.135 $\pm$ 0.009                                       | 0.142 $\pm$ 0.013                                      | 200                            | 0.0348                     |
| Adipocyte        | 0.422 $\pm$ 0.024                                       | 0.437 $\pm$ 0.035                                      | 219                            | 0.0837                     |
| T                | 0.048 $\pm$ 0.016                                       | 0.050 $\pm$ 0.013                                      | 295                            | 0.8087                     |

<sup>A</sup> Mean  $\pm$  standard deviation of the adipose cell-type proportions in the individuals with age below 40 years.

<sup>B</sup> Mean  $\pm$  standard deviation of the adipose cell-type proportions in the individuals with age over 40 years.

<sup>C</sup> Wilcoxon test statistic between the adipose cell-type proportions in the individuals below and above 40 years old.

<sup>D</sup> Wilcoxon test p-value between the adipose cell-type proportions in the individuals below and above 40 years old.

**Table S3.** Summary of the estimated proportions of the 20 major subcutaneous adipose tissue subcell-types/cell-types in METSIM (n=335).

| <b>Cell-type</b> | <b>Minimum</b> | <b>1st quartile</b> | <b>Median</b> | <b>Mean</b> | <b>3rd quartile</b> | <b>Maximum</b> | <b>Standard deviation</b> |
|------------------|----------------|---------------------|---------------|-------------|---------------------|----------------|---------------------------|
| T_1              | 0.010          | 0.121               | 0.126         | 0.130       | 0.138               | 0.297          | 0.034                     |
| T_2              | 0.020          | 0.106               | 0.115         | 0.115       | 0.122               | 0.380          | 0.037                     |
| Adip_1           | 0.007          | 0.113               | 0.118         | 0.118       | 0.121               | 0.501          | 0.043                     |
| T_3              | 0              | 0.056               | 0.062         | 0.067       | 0.074               | 0.239          | 0.028                     |
| T_4              | 0              | 0.046               | 0.049         | 0.049       | 0.052               | 0.210          | 0.021                     |
| Myel_1           | 0.009          | 0.058               | 0.061         | 0.061       | 0.063               | 0.152          | 0.015                     |
| Vasc_1           | 0.008          | 0.059               | 0.063         | 0.065       | 0.070               | 0.212          | 0.022                     |
| Adip_2           | 0.003          | 0.055               | 0.058         | 0.059       | 0.061               | 0.202          | 0.020                     |
| Myel_2           | 0              | 0.035               | 0.042         | 0.041       | 0.046               | 0.129          | 0.015                     |
| B                | 0              | 0.032               | 0.035         | 0.034       | 0.036               | 0.109          | 0.012                     |
| Myel_3           | 0.002          | 0.042               | 0.048         | 0.049       | 0.054               | 0.181          | 0.022                     |
| Myel_4           | 0              | 0.021               | 0.022         | 0.023       | 0.025               | 0.064          | 0.008                     |
| Vasc_2           | 0              | 0.023               | 0.025         | 0.024       | 0.026               | 0.071          | 0.008                     |
| Vasc_3           | 0              | 0.015               | 0.023         | 0.023       | 0.029               | 0.111          | 0.013                     |
| Ntrphl           | 0              | 0.012               | 0.014         | 0.015       | 0.016               | 0.156          | 0.015                     |
| Myel_5           | 0              | 0.004               | 0.008         | 0.008       | 0.010               | 0.035          | 0.005                     |
| Ribo             | 0              | 0.003               | 0.006         | 0.005       | 0.007               | 0.061          | 0.006                     |
| Mast             | 0              | 0                   | 0.002         | 0.002       | 0.004               | 0.017          | 0.003                     |
| ASPC             | 0.012          | 0.086               | 0.091         | 0.092       | 0.097               | 0.248          | 0.024                     |
| Fibr             | 0              | 0.018               | 0.020         | 0.020       | 0.022               | 0.100          | 0.009                     |

**Table S4.** Down sampling the numbers of individuals to match sample sizes between the younger and older groups preserves the observed SAT ASPC proportion differences in FTC and METSIM (see Table 1).

| <b>Cohort<sup>A</sup></b> | <b>Group<sup>B</sup></b> | <b>N<sub>young</sub><sup>C</sup></b> | <b>N<sub>old</sub><sup>D</sup></b> | <b>Mean ASPC proportion ± SD<sup>E</sup> of young</b> | <b>Mean ASPC proportion ± SD of old</b> | <b>W statistic<sup>F</sup></b> | <b>p-value<sup>G</sup></b> |
|---------------------------|--------------------------|--------------------------------------|------------------------------------|-------------------------------------------------------|-----------------------------------------|--------------------------------|----------------------------|
| FTC                       | Lower BMI                | 22                                   | 22                                 | 0.231 ± 0.009                                         | 0.227 ± 0.011                           | 348                            | 0.0122                     |
| FTC                       | Higher BMI               | 22                                   | 22                                 | 0.228 ± 0.011                                         | 0.220 ± 0.014                           | 319                            | 0.0723                     |
| METSIM                    | Normal BMI               | 18                                   | 18                                 | 0.096 ± 0.008                                         | 0.089 ± 0.006                           | 238                            | 0.0159                     |
| METSIM                    | Overweight               | 18                                   | 18                                 | 0.096 ± 0.007                                         | 0.090 ± 0.008                           | 189                            | 0.4064                     |
| METSIM                    | Obese                    | 18                                   | 18                                 | 0.089 ± 0.006                                         | 0.092 ± 0.006                           | 127                            | 0.2788                     |

<sup>A</sup> Finnish Twin Cohort (FTC) or METSIM cohort

<sup>B</sup> The BMI status group used for comparisons of ASPC proportions by age

<sup>C</sup> Number of individuals in the younger group

<sup>D</sup> Number of individuals in the older group

<sup>E</sup> Mean ± standard deviation (SD) of ASPC proportions

<sup>F</sup> Wilcoxon test statistic between the ASPC proportions in the young and old individuals

<sup>G</sup> Wilcoxon test p-value between the ASPC proportions in the young and old individuals

**Table S5.** ASPC marker genes from SAT snRNA-seq data of 6 individuals in FTC (see the excel file Additional File 3: Table S5.xlsx).

**Table S6.** Known motifs from HOMER enriched in promoter regions of the 151 unique SAT ASPC marker genes.

| <b>Motif Name</b> | <b>p-value<sup>A</sup></b> |
|-------------------|----------------------------|
| TBP               | 0.001                      |
| CEBPB             | 0.001                      |
| SMAD3             | 0.01                       |
| FOXA1             | 0.01                       |
| STAT5A            | 0.01                       |
| CDX2              | 0.01                       |
| ZNF652            | 0.01                       |
| TWIST2            | 0.01                       |
| SIX4              | 0.01                       |
| NEUROG2           | 0.01                       |
| SOX9              | 0.01                       |
| NFAT              | 0.01                       |
| MYOD1             | 0.01                       |
| STAT6             | 0.01                       |
| KLF10             | 0.01                       |
| HLF               | 0.01                       |
| OCT11 (POU2F3)    | 0.01                       |
| NFIL3             | 0.01                       |

<sup>A</sup> As determined by HOMER.

**Table S7.** Motifs determined by *de novo* motif discovery in HOMER to be significantly enriched ( $p < 1 \times 10^{-10}$ ) in the promoter regions of the 151 unique SAT ASPC marker genes.

| <b>Motif name</b> | <b>p-value<sup>A</sup></b> |
|-------------------|----------------------------|
| PRDM1             | $1 \times 10^{-15}$        |
| MAFK              | $1 \times 10^{-12}$        |
| TCF3              | $1 \times 10^{-11}$        |

<sup>A</sup>As determined by HOMER.

**Table S8.** Seventy-six SAT ASPC genes (i.e. 72 ASPC marker genes and four transcription factor genes regulating ASPC marker genes) are significantly differentially expressed (DE) by age (FDR<0.05) using the ASPC data from the SAT snRNA-seq cohort (n=15) (see the excel file Additional File 3: Table S8.xlsx).

**Table S9.** Our additional analysis in the independent METSIM cohort shows that 41% of the 76 age-DE SAT ASPC genes exhibit consistent DE (FDR<0.1 and the same direction as in the discovery snRNA-seq cohort) in the ASPCs from the subcutaneous adipose snRNA-seq data of the youngest and oldest age quartiles of the METSIM cohort.

| Gene name | log <sub>2</sub> FC <sup>A</sup> | p-value  | FDR      | Same Direction as Original <sup>B</sup> |
|-----------|----------------------------------|----------|----------|-----------------------------------------|
| CHL1      | 0.447                            | 1.25E-08 | 9.28E-07 | TRUE                                    |
| PLAGL1    | 0.349                            | 5.50E-08 | 2.03E-06 | FALSE                                   |
| ZFPM2     | 0.160                            | 4.91E-06 | 1.20E-04 | TRUE                                    |
| LMO3      | 0.176                            | 6.56E-06 | 1.20E-04 | TRUE                                    |
| GLI3      | 0.146                            | 8.12E-06 | 1.20E-04 | FALSE                                   |
| SNX9      | 0.288                            | 1.51E-05 | 1.86E-04 | TRUE                                    |
| PAR3B     | 0.240                            | 2.19E-05 | 2.32E-04 | TRUE                                    |
| S100A10   | 0.496                            | 2.81E-05 | 2.60E-04 | TRUE                                    |
| RORA      | 0.164                            | 3.30E-05 | 2.71E-04 | TRUE                                    |
| LPP       | 0.119                            | 4.74E-05 | 3.51E-04 | TRUE                                    |
| KCND2     | 0.059                            | 1.47E-04 | 9.13E-04 | FALSE                                   |
| OPHN1     | 0.036                            | 1.48E-04 | 9.13E-04 | FALSE                                   |
| COL1A2    | 0.031                            | 2.72E-04 | 1.48E-03 | FALSE                                   |
| LAMC1     | -0.008                           | 2.89E-04 | 1.48E-03 | FALSE                                   |
| GULP1     | 0.021                            | 3.01E-04 | 1.48E-03 | TRUE                                    |
| ABCA8     | 0.047                            | 3.74E-04 | 1.73E-03 | TRUE                                    |
| FGF14     | 0.245                            | 5.42E-04 | 2.36E-03 | TRUE                                    |
| MEIS2     | 0.088                            | 7.08E-04 | 2.83E-03 | FALSE                                   |
| CFD       | 0.066                            | 7.27E-04 | 2.83E-03 | TRUE                                    |
| GPC3      | -0.013                           | 8.66E-04 | 3.20E-03 | FALSE                                   |
| FBN1      | 0.006                            | 1.04E-03 | 3.68E-03 | TRUE                                    |
| SVEP1     | 0.212                            | 1.47E-03 | 4.94E-03 | FALSE                                   |
| TWIST2    | 0.171                            | 1.62E-03 | 5.20E-03 | FALSE                                   |
| DCN       | -0.035                           | 2.66E-03 | 8.19E-03 | FALSE                                   |
| APOD      | -0.085                           | 3.05E-03 | 9.03E-03 | FALSE                                   |
| KAZN      | 0.127                            | 4.10E-03 | 0.012    | TRUE                                    |
| ZFH4      | -0.007                           | 4.86E-03 | 0.013    | FALSE                                   |
| COL6A2    | 0.017                            | 5.33E-03 | 0.014    | TRUE                                    |
| NEGR1     | 0.132                            | 5.70E-03 | 0.014    | TRUE                                    |
| ZBTB20    | 0.071                            | 5.84E-03 | 0.014    | TRUE                                    |
| COL6A1    | -0.092                           | 6.18E-03 | 0.015    | FALSE                                   |
| PRICKLE1  | 0.389                            | 6.51E-03 | 0.015    | TRUE                                    |

|           |        |          |          |       |
|-----------|--------|----------|----------|-------|
| CDON      | -0.018 | 6.55E-03 | 0.015    | TRUE  |
| ADAM33    | 0.078  | 6.70E-03 | 0.015    | TRUE  |
| SDK1      | 0.013  | 7.73E-03 | 0.016    | TRUE  |
| SGCD      | 0.261  | 9.59E-03 | 0.020    | TRUE  |
| ST3GAL5   | 0.207  | 0.012    | 0.024    | TRUE  |
| ROBO1     | -0.076 | 0.013    | 0.025    | FALSE |
| BMPER     | 0.240  | 0.016    | 0.030    | TRUE  |
| ANTXR2    | -0.016 | 0.016    | 0.030    | FALSE |
| FBLN5     | 0.142  | 0.018    | 0.032    | TRUE  |
| CPQ       | -0.043 | 0.019    | 0.033    | FALSE |
| TIMP2     | -0.021 | 0.019    | 0.033    | TRUE  |
| SMAD3     | -0.014 | 0.020    | 0.034    | TRUE  |
| SERPINF1  | 0.124  | 0.029    | 0.047    | TRUE  |
| ANTXR1    | -0.061 | 0.030    | 0.047    | FALSE |
| ABCA10    | 0.032  | 3.97E-02 | 6.25E-02 | TRUE  |
| CCDC80    | -0.207 | 4.75E-02 | 7.33E-02 | TRUE  |
| MGP       | 0.168  | 5.18E-02 | 7.82E-02 | TRUE  |
| ABCA9-AS1 | -0.054 | 5.34E-02 | 7.85E-02 | FALSE |
| FBLN2     | -0.239 | 5.41E-02 | 7.85E-02 | FALSE |
| MRC2      | -0.018 | 6.58E-02 | 9.36E-02 | FALSE |

<sup>A</sup>Average log<sub>2</sub> fold change in the expression in ASPCs between the individuals in the lowest age quartile (age≤51, n=21) and highest age quartile (age>58, n=21). A positive log<sub>2</sub> fold change represents greater expression in the older age quartile.

<sup>B</sup> TRUE indicates that the direction of the expression change with age is consistent with the adipose snRNA-seq cohort (Additional File 3: Table S8).

**Table S10.** Our additional analysis in the independent METSIM cohort shows that 49% of the 76 age-DE SAT ASPC genes exhibit consistent DE (FDR<0.1 and the same direction of effect as in the discovery cohort) in the ASPCs from the subcutaneous adipose snRNA-seq data of non-obese (BMI<30) individuals from the METSIM cohort (n=38).

| <b>Gene name</b> | <b>log<sub>2</sub>FC<sup>A</sup></b> | <b>p-value</b> | <b>FDR</b> | <b>Same Direction as Original<sup>B</sup></b> |
|------------------|--------------------------------------|----------------|------------|-----------------------------------------------|
| PLAGL1           | 0.342                                | 8.00E-09       | 5.92E-07   | FALSE                                         |
| CHL1             | 0.390                                | 1.88E-08       | 6.94E-07   | TRUE                                          |
| LMO3             | 0.289                                | 5.71E-07       | 1.41E-05   | TRUE                                          |
| RORA             | 0.219                                | 1.07E-06       | 1.99E-05   | TRUE                                          |
| ZFPM2            | 0.177                                | 1.46E-06       | 2.16E-05   | TRUE                                          |
| SNX9             | 0.332                                | 2.09E-06       | 2.58E-05   | TRUE                                          |
| PARD3B           | 0.258                                | 5.18E-06       | 5.48E-05   | TRUE                                          |
| S100A10          | 0.472                                | 7.20E-06       | 6.66E-05   | TRUE                                          |
| GULP1            | 0.205                                | 8.21E-06       | 6.75E-05   | TRUE                                          |
| GLI3             | 0.091                                | 1.44E-05       | 1.06E-04   | FALSE                                         |
| LPP              | 0.140                                | 3.47E-05       | 2.27E-04   | TRUE                                          |
| KCND2            | 0.126                                | 3.68E-05       | 2.27E-04   | FALSE                                         |
| OPHN1            | 0.041                                | 5.92E-05       | 3.37E-04   | FALSE                                         |
| GPC3             | 0.082                                | 8.07E-05       | 4.26E-04   | TRUE                                          |
| COL1A2           | 0.014                                | 1.05E-04       | 4.95E-04   | FALSE                                         |
| MEIS2            | 0.062                                | 1.07E-04       | 4.95E-04   | FALSE                                         |
| ABCA8            | 0.067                                | 1.17E-04       | 5.08E-04   | TRUE                                          |
| CFD              | 0.060                                | 1.36E-04       | 5.33E-04   | TRUE                                          |
| FBN1             | 0.037                                | 1.37E-04       | 5.33E-04   | TRUE                                          |
| LAMC1            | -0.050                               | 1.95E-04       | 7.22E-04   | FALSE                                         |
| FGF14            | 0.253                                | 3.03E-04       | 1.07E-03   | TRUE                                          |
| CDON             | 0.093                                | 5.64E-04       | 1.90E-03   | FALSE                                         |
| KAZN             | 0.159                                | 6.96E-04       | 2.24E-03   | TRUE                                          |
| SGCD             | 0.298                                | 7.66E-04       | 2.36E-03   | TRUE                                          |
| NEGR1            | 0.165                                | 9.10E-04       | 2.61E-03   | TRUE                                          |
| ZBTB20           | 0.113                                | 9.16E-04       | 2.61E-03   | TRUE                                          |
| ADAM33           | 0.186                                | 1.23E-03       | 3.37E-03   | TRUE                                          |
| CPQ              | 0.040                                | 1.69E-03       | 4.39E-03   | TRUE                                          |
| APOD             | -0.169                               | 1.72E-03       | 4.39E-03   | FALSE                                         |
| ZFHX4            | 0.020                                | 1.98E-03       | 4.87E-03   | TRUE                                          |
| TWIST2           | 0.072                                | 2.07E-03       | 4.95E-03   | FALSE                                         |
| DCN              | -0.050                               | 2.20E-03       | 5.10E-03   | FALSE                                         |

|           |        |          |          |       |
|-----------|--------|----------|----------|-------|
| FBLN5     | 0.242  | 2.52E-03 | 5.49E-03 | TRUE  |
| SVEP1     | 0.182  | 2.50E-03 | 5.49E-03 | FALSE |
| COL6A1    | -0.120 | 2.79E-03 | 5.90E-03 | FALSE |
| SDK1      | 0.162  | 3.75E-03 | 7.69E-03 | TRUE  |
| PRICKLE1  | 0.383  | 3.84E-03 | 7.69E-03 | TRUE  |
| ANTXR2    | 0.055  | 4.38E-03 | 8.32E-03 | TRUE  |
| ROBO1     | -0.079 | 4.36E-03 | 8.32E-03 | FALSE |
| ST3GAL5   | 0.250  | 4.88E-03 | 9.02E-03 | TRUE  |
| ANTXR1    | -0.046 | 5.91E-03 | 1.07E-02 | FALSE |
| BMPER     | 0.254  | 6.56E-03 | 1.16E-02 | TRUE  |
| TIMP2     | -0.022 | 9.44E-03 | 1.62E-02 | TRUE  |
| ABCA9-AS1 | 0.033  | 1.02E-02 | 1.72E-02 | TRUE  |
| CCDC80    | -0.178 | 1.12E-02 | 1.81E-02 | TRUE  |
| SDC2      | 0.062  | 1.13E-02 | 1.81E-02 | TRUE  |
| SERPINF1  | 0.271  | 1.20E-02 | 1.88E-02 | TRUE  |
| SMAD3     | -0.041 | 1.28E-02 | 1.97E-02 | TRUE  |
| WSB1      | -0.145 | 1.41E-02 | 2.13E-02 | TRUE  |
| COL6A2    | -0.154 | 1.72E-02 | 2.54E-02 | FALSE |
| FBLN2     | -0.173 | 2.11E-02 | 3.06E-02 | FALSE |
| MGP       | 0.181  | 2.57E-02 | 3.65E-02 | TRUE  |
| MRC2      | -0.015 | 2.83E-02 | 3.94E-02 | FALSE |
| REV3L     | 0.011  | 4.04E-02 | 5.54E-02 | TRUE  |
| RUNX1T1   | -0.119 | 4.16E-02 | 5.60E-02 | FALSE |
| ABCA10    | 0.017  | 4.54E-02 | 5.99E-02 | TRUE  |

<sup>A</sup>Average log<sub>2</sub> fold change in expression in ASPCs between the individuals in the lowest age quartile (age≤51, n=19) and highest age quartile (age>58, n=19). A positive log<sub>2</sub> fold change represents greater expression in the older age quartile.

<sup>B</sup> TRUE indicates that the direction of the expression change with age is consistent with the adipose snRNA-seq cohort (Additional File 3: Table S8).

**Table S11.** The pathway tool WebGestalt identifies significantly ( $FDR < 0.05$ ) overrepresented developmental and differentiation-related Gene Ontology biological processes within the 76 age-DE SAT ASPC genes (see the excel file Additional File 3: Table S11.xlsx).

**Table S12.** The pathway tool WebGestalt identifies significantly ( $FDR < 0.05$ ) overrepresented Gene Ontology biological processes within the 79 non-age-DE SAT ASPC genes (see the excel file Additional File 3: Table S12.xlsx).

**Table S13.** Significant correlations (FDR<0.05) between the expression of the 76 age-DE SAT ASPC genes and cardiometabolic phenotypes using subcutaneous adipose bulk RNA-seq data from METSIM (n=335) (see the excel file Additional File 3: Table S13.xlsx).

**Table S14.** Significant correlations (FDR<0.05) between the expression of the 79 non-age-DE SAT ASPC marker genes and cardiometabolic phenotypes using subcutaneous adipose bulk RNA-seq data from METSIM (n=335) (see the excel file Additional File 3: Table S14.xlsx).

**Table S15.** Nearly half (47.4%) of the 76 age-DE SAT ASPC genes show significant DE by age (FDR<0.05 in the same direction as in the SAT snRNA-seq cohort) in VAT ASPCs from a publicly available VAT snRNA-seq data of 10 individuals (see the excel file Additional File 3: Table S15.xlsx).

**Table S16.** The pathway tool WebGestalt identifies significantly ( $FDR < 0.05$ ) overrepresented Gene Ontology (GO) biological processes within the 36 age-DE ASPC marker genes with consistent DE across ASPCs from the SAT and VAT fat depots (see the excel file Additional File 3: Table S16.xlsx).

**Table S17.** Seventy-five of the 76 age-DE SAT ASPC genes are DE across the 6 measured timepoints during a 14-day SAT ASPC differentiation (i.e. adipogenesis) experiment (see the excel file Additional File 3: Table S17.xlsx).

**Table S18.** Clustering of the age-DE SAT ASPC genes by their expression profiles during a 14-day SAT ASPC differentiation (i.e. adipogenesis) experiment (see the excel file Additional File 3: Table S18.xlsx).

**Table S19.** Gene set enrichment analysis using EnrichR and the human subset of the ChIP Enrichment Analysis (CHEA) 2022 database identifies 5 subgroups significantly enriched for common transcription factor targets.

| Subgrouping <sup>A</sup> | Transcription factor | Number of Overlapping Genes | Adjusted P-Value <sup>B</sup> |
|--------------------------|----------------------|-----------------------------|-------------------------------|
| Group 1                  | ZNF217               | 4                           | 2.01E-02                      |
| Group 1                  | FOXM1                | 3                           | 2.01E-02                      |
| Group 2                  | NR3C1                | 10                          | 6.59E-03                      |
| Group 2                  | MYC                  | 7                           | 2.57E-02                      |
| Group 2                  | ZNF217               | 6                           | 2.57E-02                      |
| Group 2                  | PHOX2B               | 7                           | 2.57E-02                      |
| Group 2                  | SOX2                 | 8                           | 2.57E-02                      |
| Group 2                  | TCF3/E2A             | 6                           | 3.60E-02                      |
| Group 3                  | NFKB1                | 10                          | 2.34E-03                      |
| Group 3                  | CTBP2                | 5                           | 9.10E-03                      |
| Group 3                  | KDM2B                | 6                           | 9.10E-03                      |
| Group 3                  | TCF4                 | 8                           | 9.10E-03                      |
| Group 3                  | PHOX2B               | 6                           | 1.83E-02                      |
| Group 3                  | PPARD                | 7                           | 1.95E-02                      |
| Group 3                  | ISL1                 | 4                           | 2.87E-02                      |
| Group 3                  | SMAD4                | 6                           | 3.15E-02                      |
| Group 3                  | AR                   | 5                           | 3.16E-02                      |
| Group 3                  | TCF3/E2A             | 5                           | 3.16E-02                      |
| Group 3                  | CTBP1                | 4                           | 3.20E-02                      |
| Group 4                  | UBF1/2               | 5                           | 4.64E-02                      |
| Group 4                  | SOX2                 | 6                           | 4.64E-02                      |
| Group 5                  | TCF4                 | 7                           | 1.86E-02                      |
| Group 5                  | GBX2                 | 3                           | 4.54E-02                      |
| Group 5                  | P300                 | 6                           | 4.62E-02                      |
| Group 5                  | TCF21                | 6                           | 4.62E-02                      |

<sup>A</sup> As determined using the DPGP tool to cluster the longitudinal bulk expression data from the ASPC differentiation experiment (See Fig. 4; Additional File 3: Table S18, S19).

<sup>B</sup> Benjamini-Hochberg adjusted p-value (FDR<0.05).

**Table S20.** Intercellular interactions involving the 76 age-DE SAT ASPC genes are significantly stronger ( $p < 0.05$ ) in the older individuals of the adipose snRNA-seq cohort compared to the younger individuals.

| <b>Cell-type<sup>A</sup></b> | <b>Mean interaction score in older group</b> | <b>Mean interaction score in younger group</b> | <b>p-value<sup>B</sup></b> |
|------------------------------|----------------------------------------------|------------------------------------------------|----------------------------|
| ASPC                         | 0.641                                        | 0.518                                          | 4.60E-46                   |
| Adipocyte                    | 0.602                                        | 0.442                                          | 2.25E-07                   |
| B                            | 0.551                                        | 0.509                                          | 5.21E-03                   |
| Endothelial                  | 0.660                                        | 0.524                                          | 5.77E-07                   |
| Fibroblast                   | 0.707                                        | 0.624                                          | 1.88E-06                   |
| LymphEndo                    | 0.642                                        | 0.163                                          | 4.13E-04                   |
| Mast                         | 0.583                                        | 0.496                                          | 1.59E-04                   |
| Myeloid                      | 0.603                                        | 0.522                                          | 1.79E-05                   |
| NKT                          | 0.618                                        | 0.465                                          | 2.26E-06                   |
| Perivascular                 | 0.683                                        | 0.597                                          | 9.35E-09                   |
| T                            | 0.624                                        | 0.495                                          | 1.08E-10                   |

<sup>A</sup> Cell-type interacting with ASPCs.

<sup>B</sup> As assessed by a one-sided, paired Wilcoxon test.

**Table S21.** Interactions involving the gene *RORA* show the largest differences in strength between the younger and older individuals (see the excel file Additional File 3: Table S21.xlsx).

**Table S22.** Variance in body mass index (BMI) explained by the genome-wide and regional polygenic risk scores (PRSs).

| <b>Group</b>    | <b>N</b> | <b>R<sup>2</sup><sup>A</sup> of genome-wide PRS</b> | <b>R<sup>2</sup> of age-DE<sup>B</sup> regional PRS</b> | <b>R<sup>2</sup> of non-age-DE<sup>C</sup> regional PRS</b> |
|-----------------|----------|-----------------------------------------------------|---------------------------------------------------------|-------------------------------------------------------------|
| All individuals | 193,602  | 0.1059                                              | 4.55x10 <sup>-3</sup>                                   | 5.48x10 <sup>-3</sup>                                       |
| Females         | 104,614  | 0.0793                                              | 3.66x10 <sup>-3</sup>                                   | 4.24x10 <sup>-3</sup>                                       |
| Males           | 88,988   | 0.0795                                              | 3.83x10 <sup>-3</sup>                                   | 4.88x10 <sup>-3</sup>                                       |

<sup>A</sup> Variance in BMI explained by the BMI PRS.

<sup>B</sup> The age-DE regional PRS was built using all variants in the *cis*-regions (+/-500kb) of the autosomal age-DE ASPC genes differentially expressed (DE) by age.

<sup>C</sup> The non-age-DE regional PRS was built using all variants in the *cis*-regions (+/-500kb) of the autosomal ASPC marker genes not DE by age.

**Table S23.** Estimated effect of the interaction between the age-DE regional BMI PRS and age on BMI in the individuals with normal BMI (BMI<25) and in the obese individuals (BMI>=30) in the UK Biobank.

| <b>Group</b> | <b>N</b> | <b>BMI status</b> | <b>Coefficient<sup>A</sup></b> | <b>p-value<sup>B</sup></b> |
|--------------|----------|-------------------|--------------------------------|----------------------------|
| All          | 45,203   | Normal            | -4.39x10 <sup>-4</sup>         | 0.829                      |
| All          | 45,203   | Obese             | -5.29x10 <sup>-3</sup>         | 9.50x10 <sup>-3</sup>      |
| Females      | 24,025   | Normal            | 1.26x10 <sup>-3</sup>          | 0.627                      |
| Females      | 24,025   | Obese             | -6.97x10 <sup>-3</sup>         | 7.68x10 <sup>-3</sup>      |
| Males        | 21,178   | Normal            | 2.25x10 <sup>-3</sup>          | 0.413                      |
| Males        | 21,178   | Obese             | -5.94x10 <sup>-5</sup>         | 0.983                      |

<sup>A</sup> Unstandardized  $\beta$  (regional PRS\*age) in the linear model adjusted BMI  $\sim$  age + regional PRS + regional PRS\*age.

<sup>B</sup> p-value of coefficient as assessed by a Wald test.

**Table S24.** Local variants within the age-DE SAT ASPC genes landing in ASPC open chromatin regions interact with age on BMI in obese individuals of the UK Biobank (n=45,203).

| SNP         | Interaction coefficient <sup>A</sup> | p-value <sup>B</sup> | Nearest gene <sup>C</sup> | Adjusted p-value <sup>D</sup> |
|-------------|--------------------------------------|----------------------|---------------------------|-------------------------------|
| rs17554931  | -6.74E-03                            | 3.42E-04             | CFD                       | 0.042                         |
| rs11631777  | -2.73E-03                            | 1.04E-02             | RORA                      | 1                             |
| rs10980494  | 2.07E-03                             | 2.08E-02             | SVEP1                     | 1                             |
| rs775250    | 2.11E-03                             | 2.37E-02             | STAT6                     | 1                             |
| rs782930    | 1.94E-03                             | 3.02E-02             | RORA                      | 1                             |
| rs113282909 | -3.52E-03                            | 4.53E-02             | APOD                      | 1                             |
| rs17834271  | -2.88E-03                            | 4.80E-02             | SERPINF1                  | 1                             |

<sup>A</sup> Unstandardized  $\beta$ (SNP\*age) in the linear model adjusted BMI  $\sim$  age + SNP + SNP\*age

<sup>B</sup> As assessed by a Wald-test.

<sup>C</sup> Nearest gene among the age-DE ASPC genes.

<sup>D</sup> Bonferroni corrected p-value.
